# Supplementary material for: Mycobiome Diversity of the Cave Church of Sts. Peter and Paul in Serbia—Risk Assessment Implication for the Conservation of Rare Cavern Habitat Housing a Peculiar Fresco Painting
Source: MDPI journal article supplement (doi:10.3390/jof8121263), 2022-11-30
Supplement: s1 [file s1]

**Table S3:** Alpha diversity within the analyzed individual samples from fresco painting and from sampling points of the cave interior and presented at the phylum, family, genus, and ASV level.

| Sample | Description                                        | OBS | Chao1 | se.chao1 | ACE   | se.ACE | Shannon | Gini-Simpson | Inv Simpson | level  |
|--------|----------------------------------------------------|-----|-------|----------|-------|--------|---------|--------------|-------------|--------|
| 01     | Depiction of Jesus                                 | 124 | 130.4 | 5.5      | 129.0 | 5.3    | 2.0     | 0.7          | 3.8         | ASV    |
| 02     | Entire fresco except depiction of Jesus            | 145 | 145.7 | 1.1      | 146.4 | 5.7    | 2.2     | 0.8          | 4.0         |        |
| 03     | Gray discoloration on fresco                       | 47  | 47.0  | 0.0      | 47.0  | 3.1    | 1.6     | 0.7          | 3.1         |        |
| 04-05  | Fresco surface damage                              | 306 | 310.5 | 3.9      | 308.8 | 8.4    | 2.5     | 0.8          | 4.5         |        |
| 06     | Iconostasis                                        | 141 | 141.9 | 1.4      | 142.3 | 5.7    | 1.7     | 0.6          | 2.8         |        |
| 07     | Blue-green deposits on stone wall under the fresco | 421 | 422.9 | 2.3      | 422.4 | 8.3    | 4.3     | 1.0          | 30.3        |        |
| 08     | Green patina on stone wall                         | 183 | 207.0 | 11.0     | 202.4 | 6.7    | 1.8     | 0.7          | 3.5         |        |
| 09     | Black deposits on stone wall                       | 255 | 255.0 | 0.1      | 255.2 | 6.4    | 3.6     | 0.9          | 15.9        |        |
| 10     | White deposits on stone wall                       | 514 | 519.1 | 3.8      | 517.6 | 10.9   | 4.0     | 1.0          | 21.3        |        |
| 11     | Pink deposits on stone wall                        | 526 | 551.6 | 9.2      | 551.3 | 11.3   | 3.2     | 0.9          | 10.8        |        |
| 01     | Depiction of Jesus                                 | 77  | 88.0  | 8.9      | 85.1  | 4.4    | 1.2     | 0.5          | 1.9         | Genus  |
| 02     | Entire fresco except depiction of Jesus            | 84  | 84.6  | 1.2      | 84.9  | 4.3    | 1.3     | 0.5          | 2.0         |        |
| 03     | Gray discoloration on fresco                       | 26  | 26.0  | 0.5      | 26.2  | 2.5    | 0.8     | 0.4          | 1.7         |        |
| 04-05  | Fresco surface damage                              | 173 | 175.1 | 2.3      | 175.3 | 6.5    | 1.7     | 0.6          | 2.3         |        |
| 06     | Iconostasis                                        | 60  | 62.5  | 2.9      | 64.4  | 3.8    | 1.1     | 0.4          | 1.6         |        |
| 07     | Blue-green deposits on stone wall under the fresco | 235 | 235.3 | 0.9      | 235.5 | 5.9    | 3.5     | 0.9          | 14.6        |        |
| 08     | Green patina on stone wall                         | 112 | 119.6 | 5.0      | 120.7 | 5.1    | 1.3     | 0.6          | 2.8         |        |
| 09     | Black deposits on stone wall                       | 133 | 133.8 | 1.4      | 133.8 | 4.9    | 2.6     | 0.9          | 7.0         |        |
| 10     | White deposits on stone wall                       | 271 | 273.3 | 2.6      | 273.0 | 7.3    | 3.3     | 0.9          | 12.2        |        |
| 11     | Pink deposits on stone wall                        | 276 | 285.0 | 5.5      | 283.1 | 8.2    | 1.8     | 0.6          | 2.7         |        |
| 01     | Depiction of Jesus                                 | 54  | 56.5  | 3.2      | 56.6  | 3.6    | 1.1     | 0.5          | 1.9         | Family |
| 02     | Entire fresco except depiction of Jesus            | 56  | 56.3  | 0.9      | 56.7  | 3.5    | 1.2     | 0.5          | 2.0         |        |
| 03     | Gray discoloration on fresco                       | 22  | 22.0  | 0.5      | 22.2  | 2.2    | 0.8     | 0.4          | 1.7         |        |
| 04-05  | Fresco surface damage                              | 95  | 95.8  | 1.4      | 96.0  | 4.4    | 1.6     | 0.6          | 2.3         |        |
| 06     | Iconostasis                                        | 45  | 45.2  | 0.6      | 46.1  | 3.1    | 1.1     | 0.4          | 1.6         |        |
| 07     | Blue-green deposits on stone wall under the fresco | 138 | 139.0 | 1.8      | 139.2 | 3.7    | 3.2     | 0.9          | 13.1        |        |
| 08     | Green patina on stone                              | 83  | 84.3  | 1.6      | 86.2  | 4.4    | 1.3     | 0.6          | 2.8         |        |

|       |                                                    |     |       |     |       |     |     |     |     |        |
|-------|----------------------------------------------------|-----|-------|-----|-------|-----|-----|-----|-----|--------|
|       | wall                                               |     |       |     |       |     |     |     |     |        |
| 09    | Black deposits on stone wall                       | 91  | 91.0  | 0.1 | 91.3  | 3.2 | 2.5 | 0.9 | 6.9 |        |
| 10    | White deposits on stone wall                       | 147 | 148.0 | 1.6 | 148.2 | 5.4 | 2.8 | 0.9 | 8.8 |        |
| 11    | Pink deposits on stone wall                        | 153 | 157.1 | 3.6 | 157.7 | 6.0 | 1.8 | 0.6 | 2.7 |        |
| 01    | Depiction of Jesus                                 | 3   | 3.0   | 0.0 | 3.0   | 0.0 | 0.0 | 0.0 | 1.0 |        |
| 02    | Entire fresco except depiction of Jesus            | 3   | 3.0   | 0.0 | 3.0   | 0.0 | 0.1 | 0.0 | 1.0 |        |
| 03    | Gray discoloration on fresco                       | 3   | 3.0   | 0.0 | 3.0   | 0.0 | 0.1 | 0.1 | 1.1 |        |
| 04-05 | Fresco surface damage                              | 3   | 3.0   | 0.0 | 3.0   | 0.0 | 0.2 | 0.1 | 1.1 |        |
| 06    | Iconostasis                                        | 3   | 3.0   | 0.0 | 3.0   | 0.0 | 0.2 | 0.1 | 1.1 |        |
| 07    | Blue-green deposits on stone wall under the fresco | 6   | 6.0   | 0.0 | 6.0   | 1.2 | 0.4 | 0.2 | 1.3 | Phylum |
| 08    | Green patina on stone wall                         | 3   | 3.0   | 0.0 | 3.0   | 0.0 | 0.5 | 0.3 | 1.5 |        |
| 09    | Black deposits on stone wall                       | 4   | 4.0   | 0.0 | 4.0   | 0.9 | 0.4 | 0.2 | 1.2 |        |
| 10    | White deposits on stone wall                       | 3   | 3.0   | 0.0 | 3.0   | 0.0 | 0.3 | 0.2 | 1.2 |        |
| 11    | Pink deposits on stone wall                        | 3   | 3.0   | 0.0 | 3.0   | 0.0 | 0.3 | 0.1 | 1.1 |        |
