# Supplementary material for: Mycobiome Diversity of the Cave Church of Sts. Peter and Paul in Serbia—Risk Assessment Implication for the Conservation of Rare Cavern Habitat Housing a Peculiar Fresco Painting
Source: MDPI journal article supplement (doi:10.3390/jof8121263), 2022-11-30
Supplement: s1 [file s1]

**Table S1:** Number of the read retention and sequence decontamination.

| Sample  | Input  | Primer<br>remove | Quality<br>filter | DenoisedF | DenoisedR | Merged | Chimera<br>remove | Length<br>trim | Decontaminated<br>reads | Percent<br>retained | Final % of<br>reads |
|---------|--------|------------------|-------------------|-----------|-----------|--------|-------------------|----------------|-------------------------|---------------------|---------------------|
| 01      | 146032 | 146011           | 126074            | 125920    | 125926    | 123833 | 123243            | 123123         | 123123                  | 100.00              | 84.31               |
| 02      | 121155 | 121129           | 105719            | 105598    | 105520    | 103775 | 103366            | 103143         | 103132                  | 99.99               | 85.12               |
| 03      | 131888 | 131489           | 115908            | 115782    | 115749    | 114170 | 113671            | 113529         | 113529                  | 100.00              | 86.08               |
| 04-05   | 144142 | 144109           | 124385            | 123796    | 123816    | 120118 | 119639            | 119189         | 119030                  | 99.87               | 82.58               |
| 06      | 222761 | 222756           | 195332            | 195034    | 195046    | 194118 | 190250            | 190146         | 190144                  | 100.00              | 85.36               |
| 07      | 113986 | 113400           | 95391             | 94974     | 94847     | 85837  | 85470             | 76784          | 76734                   | 99.93               | 67.32               |
| 08      | 195373 | 195332           | 165480            | 164280    | 164969    | 158680 | 157365            | 156531         | 156531                  | 100.00              | 80.12               |
| 09      | 106494 | 106142           | 92015             | 91465     | 91529     | 88405  | 87916             | 86065          | 86065                   | 100.00              | 80.82               |
| 10      | 124493 | 124422           | 104819            | 104293    | 104341    | 101754 | 101204            | 97881          | 97746                   | 99.86               | 78.52               |
| 11      | 198895 | 198864           | 171957            | 171183    | 171198    | 165199 | 162917            | 161419         | 161382                  | 99.98               | 81.14               |
| Control | 123    | 83               | 15                | 10        | 10        | 10     | 10                | 10             | 10                      | -                   | 8.13                |
