# Supplementary material for: Mycobiome Diversity of the Cave Church of Sts. Peter and Paul in Serbia—Risk Assessment Implication for the Conservation of Rare Cavern Habitat Housing a Peculiar Fresco Painting
Source: MDPI journal article supplement (doi:10.3390/jof8121263), 2022-11-30
Supplement: s1 [file s1]

**Supplementary Table S2.** Molecular analyses of culturable fungi from the cave Church of Sts. Peter and Paul

| No | Strain      | Isolate                             | Gene bank accession number |          | Homology |        |
|----|-------------|-------------------------------------|----------------------------|----------|----------|--------|
|    |             |                                     | ITS                        | BenA     | ITS      | BenA   |
| 1  | BEOFB280m   | <i>Alternaria abundans</i>          | OL457279                   | -        | 100.00   | -      |
| 2  | BEOFB218m   | <i>Alternaria alternata</i>         | OL457258                   | -        | 100.00   | -      |
| 3  | BEOFB219m   | <i>Alternaria alternata</i>         | OL457273                   | -        | 99.81    | -      |
| 4  | BEOFB2110m  | <i>Alternaria alternata</i>         | OL457275                   | -        | 99.81    | -      |
| 5  | BEOFB290m   | <i>Alternaria brassicae</i>         | OL457269                   | -        | 99.81    | -      |
| 6  | BEOFB3320m  | <i>Aspergillus aureolatus</i>       | OL457263                   | OL631576 | 99.44    | 100.00 |
| 7  | BEOFB3321m  | <i>Aspergillus aureolatus</i>       | OL457292                   | OL631583 | 99.81    | 100.00 |
| 8  | BEOFB3174m  | <i>Aspergillus pseudoglaucus</i>    | OL457285                   | OL631581 | 100.00   | 100.00 |
| 9  | BEOFB2910m  | <i>Beauveria pseudobassiana</i>     | OL457286                   | -        | 99.43    | -      |
| 10 | BEOFB1605   | <i>Bjerkandera adusta</i>           | OL457268                   | -        | 100.00   | -      |
| 11 | BEOFB6100m  | <i>Blastobotrys niveus</i>          | OL405446                   | -        | 89.54    | -      |
| 12 | BEOFB5701m  | <i>Botryotrichum murorum</i>        | OL405554                   | -        | 99.81    | -      |
| 13 | BEOFB3105m  | <i>Botrytis cinerea</i>             | OL457283                   | -        | 100.00   | -      |
| 14 | BEOFB18212m | <i>Cladosporium cladosporioides</i> | OL457259                   | -        | 100.00   | -      |
| 15 | BEOFB18213m | <i>Cladosporium cladosporioides</i> | OL457260                   | -        | 100.00   | -      |
| 16 | BEOFB18214m | <i>Cladosporium cladosporioides</i> | OL457262                   | -        | 100.00   | -      |
| 17 | BEOFB18215m | <i>Cladosporium cladosporioides</i> | OL457266                   | -        | 99.80    | -      |
| 18 | BEOFB18216m | <i>Cladosporium cladosporioides</i> | OL457267                   | -        | 100.00   | -      |
| 19 | BEOFB18217m | <i>Cladosporium cladosporioides</i> | OL457278                   | -        | 100.00   | -      |
| 20 | BEOFB18218m | <i>Cladosporium cladosporioides</i> | OL457282                   | -        | 100.00   | -      |
| 21 | BEOFB18219m | <i>Cladosporium cladosporioides</i> | OL457288                   | -        | 99.38    | -      |
| 22 | BEOFB2120   | <i>Coprinellus disseminatus</i>     | OL457261                   | -        | 99.85    | -      |
| 23 | BEOFB2130   | <i>Coprinellus domesticus</i>       | OL457272                   | -        | 99.29    | -      |
| 24 | BEOFB1711m  | <i>Epicoccum nigrum</i>             | OL457274                   | -        | 96.97    | -      |
| 25 | BEOFB863m   | <i>Fusarium sporotrichioides</i>    | OL457287                   | OL631582 | 100.00   | 100.00 |
| 26 | BEOFB6001m  | <i>Mortierella alpina</i>           | OL457284                   | -        | 99.84    | -      |
| 27 | BEOFB6002m  | <i>Mortierella alpina</i>           | OL457289                   | -        | 99.68    | -      |
| 28 | BEOFB6003m  | <i>Mortierella alpina</i>           | OL457291                   | -        | 99.68    | -      |
| 29 | BEOFB6004m  | <i>Mortierella alpina</i>           | OL457293                   | -        | 99.67    | -      |
| 30 | BEOFB6005m  | <i>Mortierella alpina</i>           | OL457294                   | -        | 99.68    | -      |
| 31 | BEOFB6006m  | <i>Mortierella alpina</i>           | OL457270                   | -        | 99.84    | -      |
| 32 | BEOFB3511m  | <i>Mucor hiemalis</i>               | OL457271                   | -        | 99.84    | -      |
| 33 | BEOFB6200m  | <i>Paragyodontium album</i>         | OL457280                   | -        | 100.00   | -      |
| 34 | BEOFB1109m  | <i>Penicillium brevicompactum</i>   | OL457281                   | OL631580 | 99.81    | 100.00 |
| 35 | BEOFB11191m | <i>Penicillium citreonigrum</i>     | OL405444                   | OL519900 | 99.62    | 100.00 |
| 36 | BEOFB11192m | <i>Penicillium citreonigrum</i>     | OL405565                   | OL519901 | 100.00   | 100.00 |
| 37 | BEOFB11193m | <i>Penicillium citreonigrum</i>     | OL457264                   | OL631577 | 100.00   | 100.00 |
| 38 | BEOFB11132m | <i>Penicillium expansum</i>         | OL457295                   | OL631584 | 100.00   | 100.00 |
| 39 | BEOFB11230m | <i>Penicillium frei</i>             | OL457277                   | OL631579 | 99.63    | 100.00 |
| 40 | BEOFB11211m | <i>Penicillium samsonianum</i>      | OL457265                   | OL631578 | 99.62    | 100.00 |
| 41 | BEOFB1730   | <i>Stereum gausapatum</i>           | OL457276                   | -        | 100.00   | -      |
| 42 | BEOFB1260m  | <i>Trichoderma viridescens</i>      | OL457290                   | -        | 99.82    | -      |
